# Supplementary material for: Systematic Identification of the Optimal Housekeeping Genes for Accurate Transcriptomic and Proteomic Profiling of Tissues following Complex Traumatic Injury
Source: MDPI journal article supplement (doi:10.3390/mps6020022), 2023-02-23
Supplement: s1 [file s1]

## Supplementary Materials

**Table S1.** List of common reference housekeeping genes based on a targeted literature search conducted using the PubMed database (2013–2023) involving qPCR data normalization studies across diverse spectrums of tissues, disease models, and animal species. Values indicate the number of peer-reviewed articles that mentioned or used a particular HKG in the context of qPCR data normalization.

|              | “Housekeeping gene” | “Reference” | “Internal control” | “qPCR reference” |
|--------------|---------------------|-------------|--------------------|------------------|
| <i>Gapdh</i> | 513                 | 1053        | 398                | 499              |
| <i>Actb</i>  | 202                 | 433         | 81                 | 256              |
| <i>Tbp</i>   | 140                 | 311         | 54                 | 139              |
| <i>B2m</i>   | 132                 | 277         | 59                 | 161              |
| <i>Hprt1</i> | 101                 | 206         | 33                 | 123              |
| <i>Pgk1</i>  | 50                  | 77          | 14                 | 41               |
| <i>Rplp0</i> | 40                  | 70          | 12                 | 43               |
| <i>Tfrc</i>  | 35                  | 49          | 8                  | 23               |
| <i>Rplp2</i> | 2                   | 7           | 0                  | 4                |

**Table S2.** List and characteristics of antibodies used in this study.

| Antibody | Brand             | Catalog number | Dilution used |
|----------|-------------------|----------------|---------------|
| ACTB     | Abcam             | Ab49900        | 1:30,000      |
| B2M      | Novus Biologicals | NBP2-92971     | 1:500         |
| GAPDH    | Cell Signaling    | 5174           | 1:5,000       |
| HPRT1    | Novus Biologicals | NBP1-92006     | 1:1,000       |
| PGK1     | Santa Cruz        | SC-130335      | 1:3,000       |
| RPLP0    | Abcam             | AB192866       | 1:800         |
| RPLP2    | Novus Biologicals | NBP2-33688     | 1:800         |
| TBP      | Cell Signaling    | 8515S          | 1:800         |
| TFRC     | Novus Biologicals | NB100-92243SS  | 1:800         |

**Table S3.** Calculated mean of Ct values, standard deviations and coefficients of gene expression variation (CV) for the 9 housekeeping genes under steady state and post- injury in lung, liver, kidney and skeletal muscle (n ≥ 4 animals/group).

| Lung         | Naïve                     | 6 h Post-Injury           | 24 h Post-Injury          | 168 h Post-Injury         | All Injury time-points    | Naïve+ All time-points    |
|--------------|---------------------------|---------------------------|---------------------------|---------------------------|---------------------------|---------------------------|
| <i>Actb</i>  | 23.77 ± 2.22<br>CV: 0.093 | 29.87 ± 3.97<br>CV: 0.133 | 24.54 ± 1.13<br>CV: 0.046 | 24.64 ± 0.81<br>CV: 0.033 | 26.25 ± 3.40<br>CV: 0.130 | 25.09 ± 3.16<br>CV: 0.126 |
| <i>B2m</i>   | 20.50 ± 1.87<br>CV: 0.091 | 25.03 ± 2.66<br>CV: 0.106 | 20.77 ± 1.59<br>CV: 0.077 | 20.86 ± 1.04<br>CV: 0.050 | 21.94 ± 2.58<br>CV: 0.118 | 21.25 ± 2.38<br>CV: 0.112 |
| <i>Gapdh</i> | 24.46 ± 1.42<br>CV: 0.058 | 26.67 ± 1.38<br>CV: 0.052 | 23.65 ± 1.63<br>CV: 0.069 | 24.76 ± 0.76<br>CV: 0.031 | 24.90 ± 1.73<br>CV: 0.069 | 24.69 ± 1.60<br>CV: 0.065 |
| <i>Hprt1</i> | 25.08 ± 1.42<br>CV: 0.057 | 27.41 ± 1.93<br>CV: 0.070 | 24.18 ± 0.86<br>CV: 0.036 | 24.64 ± 0.78<br>CV: 0.032 | 25.27 ± 1.85<br>CV: 0.073 | 25.17 ± 1.65<br>CV: 0.066 |
| <i>Pgk1</i>  | 21.64 ± 0.55<br>CV: 0.025 | 22.22 ± 1.80<br>CV: 0.081 | 20.89 ± 0.46<br>CV: 0.022 | 21.70 ± 0.33<br>CV: 0.015 | 21.61 ± 1.19<br>CV: 0.055 | 21.62 ± 0.96<br>CV: 0.044 |

|               |                           |                           |                           |                           |                               |                               |
|---------------|---------------------------|---------------------------|---------------------------|---------------------------|-------------------------------|-------------------------------|
| <i>Rplp0</i>  | 19.38 ± 1.12<br>CV: 0.058 | 22.3 ± 2.82<br>CV: 0.126  | 18.87 ± 0.74<br>CV: 0.039 | 19.18 ± 0.49<br>CV: 0.026 | 20.06 ± 2.25<br>CV: 0.112     | 19.74 ± 1.85<br>CV: 0.094     |
| <i>Rplp2</i>  | 22.61 ± 1.63<br>CV: 0.072 | 26.83 ± 3.10<br>CV: 0.116 | 22.33 ± 1.02<br>CV: 0.046 | 22.55 ± 0.64<br>CV: 0.028 | 23.82 ± 2.76<br>CV: 0.116     | 23.26 ± 2.38<br>CV: 0.102     |
| <i>Tbp</i>    | 27.71 ± 2.17<br>CV: 0.078 | 31.58 ± 2.35<br>CV: 0.074 | 27.78 ± 0.92<br>CV: 0.033 | 28.58 ± 0.76<br>CV: 0.027 | 29.11 ± 2.08<br>CV: 0.071     | 28.44 ± 2.23<br>CV: 0.078     |
| <i>Tfrc</i>   | 28.13 ± 1.55<br>CV: 0.055 | 30.06 ± 0.96<br>CV: 0.032 | 28.03 ± 1.01<br>CV: 0.036 | 29.08 ± 0.49<br>CV: 0.017 | 28.99 ± 1.14<br>CV: 0.039     | 28.59 ± 1.41<br>CV: 0.049     |
| <b>Liver</b>  | <b>Naïve</b>              | <b>6 h Post-Injury</b>    | <b>24 h Post-Injury</b>   | <b>168 h Post-Injury</b>  | <b>All Injury time-points</b> | <b>Naïve+ All time-points</b> |
| <i>Actb</i>   | 25.44 ± 1.31<br>CV: 0.051 | 29.92 ± 5.08<br>CV: 0.170 | 29.12 ± 3.95<br>CV: 0.136 | 30.75 ± 5.11<br>CV: 0.166 | 29.93 ± 4.79<br>CV: 0.160     | 28.05 ± 4.35<br>CV: 0.155     |
| <i>B2m</i>    | 20.59 ± 1.25<br>CV: 0.061 | 23.71 ± 2.94<br>CV: 0.124 | 23.28 ± 1.94<br>CV: 0.083 | 24.84 ± 3.34<br>CV: 0.134 | 23.94 ± 2.88<br>CV: 0.120     | 22.54 ± 2.85<br>CV: 0.126     |
| <i>Gapdh</i>  | 22.86 ± 1.41<br>CV: 0.062 | 22.56 ± 1.10<br>CV: 0.049 | 22.92 ± 0.73<br>CV: 0.032 | 25.33 ± 1.34<br>CV: 0.053 | 23.61 ± 1.64<br>CV: 0.069     | 23.29 ± 1.59<br>CV: 0.068     |
| <i>Hprt1</i>  | 25.55 ± 1.07<br>CV: 0.042 | 25.14 ± 1.02<br>CV: 0.041 | 25.44 ± 0.32<br>CV: 0.013 | 28.93 ± 2.84<br>CV: 0.098 | 26.50 ± 2.46<br>CV: 0.093     | 26.10 ± 2.05<br>CV: 0.079     |
| <i>Pgk1</i>   | 21.91 ± 0.51<br>CV: 0.023 | 21.28 ± 0.75<br>CV: 0.035 | 20.83 ± 0.31<br>CV: 0.015 | 24.66 ± 3.11<br>CV: 0.126 | 22.26 ± 2.52<br>CV: 0.113     | 22.11 ± 1.96<br>CV: 0.089     |
| <i>Rplp0</i>  | 20.90 ± 0.58<br>CV: 0.028 | 18.58 ± 0.78<br>CV: 0.042 | 18.32 ± 0.38<br>CV: 0.021 | 23.03 ± 2.72<br>CV: 0.118 | 19.98 ± 2.71<br>CV: 0.136     | 20.37 ± 2.15<br>CV: 0.106     |
| <i>Rplp2</i>  | 23.50 ± 1.00<br>CV: 0.043 | 21.43 ± 0.86<br>CV: 0.040 | 20.88 ± 0.94<br>CV: 0.045 | 25.75 ± 1.81<br>CV: 0.070 | 22.68 ± 2.52<br>CV: 0.111     | 23.03 ± 2.07<br>CV: 0.090     |
| <i>Tbp</i>    | 29.25 ± 1.11<br>CV: 0.038 | 27.21 ± 0.67<br>CV: 0.025 | 27.51 ± 0.67<br>CV: 0.024 | 34.61 ± 4.50<br>CV: 0.130 | 29.78 ± 4.33<br>CV: 0.145     | 29.56 ± 3.38<br>CV: 0.114     |
| <i>Tfrc</i>   | 27.86 ± 1.35<br>CV: 0.048 | 26.98 ± 0.85<br>CV: 0.032 | 25.84 ± 0.78<br>CV: 0.030 | 32.54 ± 4.18<br>CV: 0.128 | 28.46 ± 3.85<br>CV: 0.135     | 28.21 ± 3.07<br>CV: 0.109     |
| <b>Kidney</b> | <b>Naïve</b>              | <b>6 h Post-Injury</b>    | <b>24 h Post-Injury</b>   | <b>168 h Post-Injury</b>  | <b>All Injury time-points</b> | <b>Naïve+ All time-points</b> |
| <i>Actb</i>   | 25.96 ± 1.47<br>CV: 0.057 | 25.33 ± 1.02<br>CV: 0.040 | 29.51 ± 7.47<br>CV: 0.253 | 25.95 ± 0.93<br>CV: 0.036 | 26.93 ± 4.75<br>CV: 0.176     | 26.52 ± 3.78<br>CV: 0.143     |
| <i>B2m</i>    | 24.07 ± 1.35<br>CV: 0.056 | 23.49 ± 1.33<br>CV: 0.057 | 23.25 ± 3.50<br>CV: 0.151 | 23.67 ± 0.48<br>CV: 0.020 | 23.47 ± 2.19<br>CV: 0.093     | 23.72 ± 1.90<br>CV: 0.080     |
| <i>Gapdh</i>  | 23.38 ± 1.15<br>CV: 0.049 | 22.71 ± 0.73<br>CV: 0.032 | 21.72 ± 0.86<br>CV: 0.040 | 24.10 ± 0.69<br>CV: 0.029 | 22.84 ± 1.24<br>CV: 0.054     | 23.06 ± 1.24<br>CV: 0.054     |
| <i>Hprt1</i>  | 27.32 ± 0.94<br>CV: 0.034 | 25.70 ± 0.79<br>CV: 0.031 | 24.74 ± 0.72<br>CV: 0.029 | 27.82 ± 0.72<br>CV: 0.026 | 26.09 ± 1.48<br>CV: 0.057     | 26.60 ± 1.42<br>CV: 0.053     |
| <i>Pgk1</i>   | 22.29 ± 0.56<br>CV: 0.025 | 20.52 ± 0.66<br>CV: 0.032 | 19.95 ± 0.31<br>CV: 0.016 | 22.60 ± 0.51<br>CV: 0.023 | 21.03 ± 1.25<br>CV: 0.059     | 21.56 ± 1.20<br>CV: 0.056     |
| <i>Rplp0</i>  | 21.34 ± 0.58<br>CV: 0.027 | 19.43 ± 0.66<br>CV: 0.034 | 18.63 ± 0.36<br>CV: 0.019 | 20.98 ± 0.46<br>CV: 0.022 | 19.68 ± 1.10<br>CV: 0.056     | 20.38 ± 1.23<br>CV: 0.060     |
| <i>Rplp2</i>  | 23.76 ± 0.74<br>CV: 0.031 | 22.22 ± 0.69<br>CV: 0.031 | 21.52 ± 0.59<br>CV: 0.027 | 23.95 ± 0.69<br>CV: 0.029 | 22.57 ± 1.22<br>CV: 0.054     | 23.07 ± 1.20<br>CV: 0.052     |
| <i>Tbp</i>    | 30.26 ± 1.20<br>CV: 0.040 | 28.25 ± 0.65<br>CV: 0.023 | 27.82 ± 0.34<br>CV: 0.012 | 30.69 ± 0.45<br>CV: 0.015 | 28.92 ± 1.36<br>CV: 0.047     | 29.45 ± 1.45<br>CV: 0.049     |
| <i>Tfrc</i>   | 28.63 ± 1.19<br>CV: 0.042 | 26.92 ± 0.83<br>CV: 0.031 | 26.25 ± 0.27<br>CV: 0.010 | 29.67 ± 0.70<br>CV: 0.024 | 27.61 ± 1.61<br>CV: 0.058     | 28.04 ± 1.54<br>CV: 0.055     |
| <b>Muscle</b> | <b>Naïve</b>              | <b>6 h Post-Injury</b>    | <b>24 h Post-Injury</b>   | <b>168 h Post-Injury</b>  | <b>All Injury time-points</b> | <b>Naïve+ All time-points</b> |
| <i>Actb</i>   | 28.85 ± 2.93<br>CV: 0.102 | 26.42 ± 1.83<br>CV: 0.069 | 26.10 ± 1.31<br>CV: 0.050 | 23.86 ± 1.06<br>CV: 0.044 | 25.46 ± 1.83<br>CV: 0.072     | 26.67 ± 2.80<br>CV: 0.105     |
| <i>B2m</i>    | 24.77 ± 3.10<br>CV: 0.125 | 22.35 ± 1.73<br>CV: 0.077 | 22.08 ± 1.27<br>CV: 0.058 | 19.72 ± 0.99<br>CV: 0.050 | 21.38 ± 1.81<br>CV: 0.085     | 22.59 ± 2.86<br>CV: 0.127     |
| <i>Gapdh</i>  | 21.38 ± 3.73<br>CV: 0.174 | 19.47 ± 2.65<br>CV: 0.136 | 19.20 ± 1.29<br>CV: 0.067 | 18.94 ± 1.08<br>CV: 0.057 | 19.20 ± 1.83<br>CV: 0.095     | 19.98 ± 2.86<br>CV: 0.143     |
| <i>Hprt1</i>  | 26.95 ± 3.40              | 25.13 ± 2.50              | 23.93 ± 1.52              | 23.39 ± 0.73              | 24.15 ± 1.89                  | 25.15 ± 2.87                  |

|              | CV: 0.126                 | CV: 0.099                 | CV: 0.064                 | CV: 0.031                 | CV: 0.078                 | CV: 0.114                 |
|--------------|---------------------------|---------------------------|---------------------------|---------------------------|---------------------------|---------------------------|
| <i>Pgk1</i>  | 19.18 ± 1.17<br>CV: 0.061 | 19.39 ± 1.81<br>CV: 0.093 | 18.97 ± 0.50<br>CV: 0.026 | 20.11 ± 0.80<br>CV: 0.040 | 19.49 ± 1.27<br>CV: 0.065 | 19.38 ± 1.24<br>CV: 0.064 |
| <i>Rplp0</i> | 21.15 ± 2.34<br>CV: 0.111 | 20.48 ± 1.85<br>CV: 0.090 | 18.82 ± 0.80<br>CV: 0.043 | 18.54 ± 0.50<br>CV: 0.027 | 19.28 ± 1.47<br>CV: 0.076 | 19.95 ± 2.04<br>CV: 0.102 |
| <i>Rplp2</i> | 24.64 ± 2.89<br>CV: 0.117 | 22.78 ± 1.98<br>CV: 0.087 | 22.09 ± 1.33<br>CV: 0.060 | 20.90 ± 0.55<br>CV: 0.026 | 21.92 ± 1.61<br>CV: 0.073 | 22.89 ± 2.52<br>CV: 0.110 |
| <i>Tbp</i>   | 30.92 ± 3.27<br>CV: 0.106 | 29.49 ± 2.53<br>CV: 0.086 | 28.62 ± 1.37<br>CV: 0.048 | 27.36 ± 0.56<br>CV: 0.020 | 28.49 ± 1.91<br>CV: 0.067 | 29.36 ± 2.74<br>CV: 0.093 |
| <i>Tfrc</i>  | 27.01 ± 3.42<br>CV: 0.127 | 27.29 ± 2.02<br>CV: 0.074 | 28.71 ± 1.02<br>CV: 0.036 | 26.35 ± 0.88<br>CV: 0.033 | 27.45 ± 1.70<br>CV: 0.062 | 27.29 ± 2.47<br>CV: 0.091 |

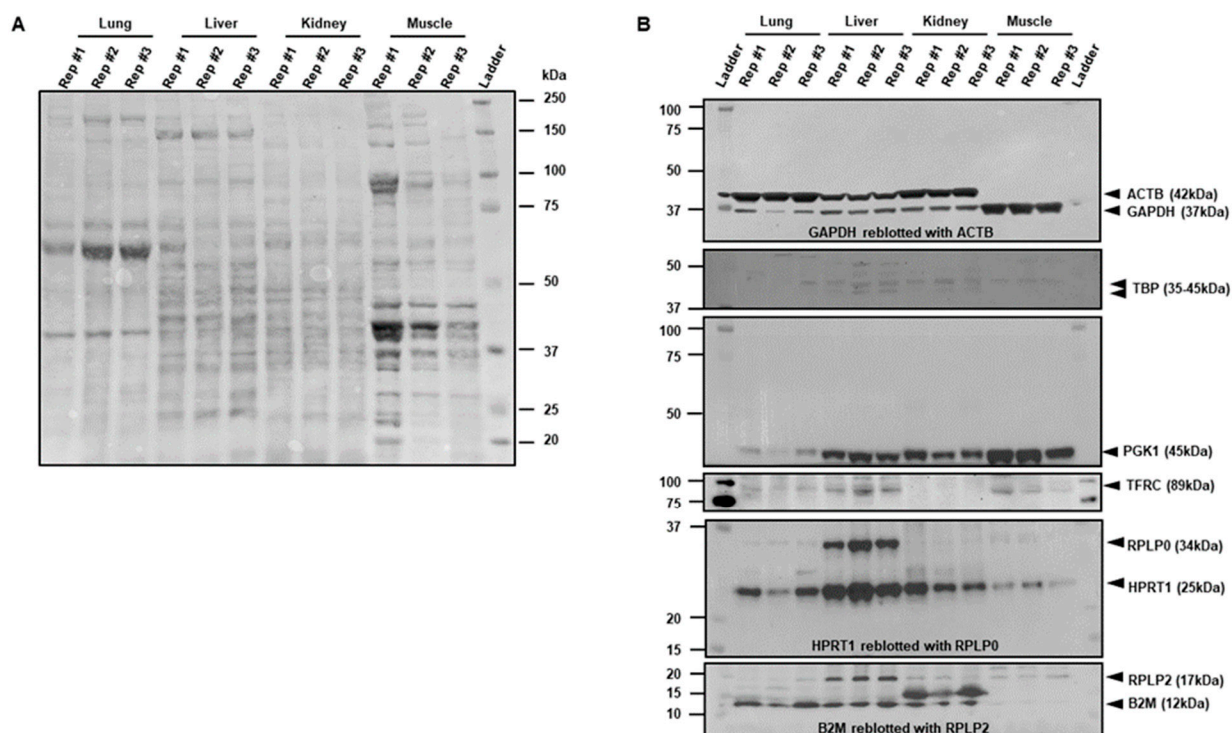

**Figure S1.** Representative Ponceau S and Western blot images. **(A)** Representative Ponceau S total protein staining following protein transfer from SDS-Page gels to nitrocellulose membranes. **(B)** Immunoblots against 9 HKGs for naïve lung, liver, kidney and muscle tissue (15 µg of total protein loaded lane; n = 3 biological replicates indicated as #1, #2 and #3).

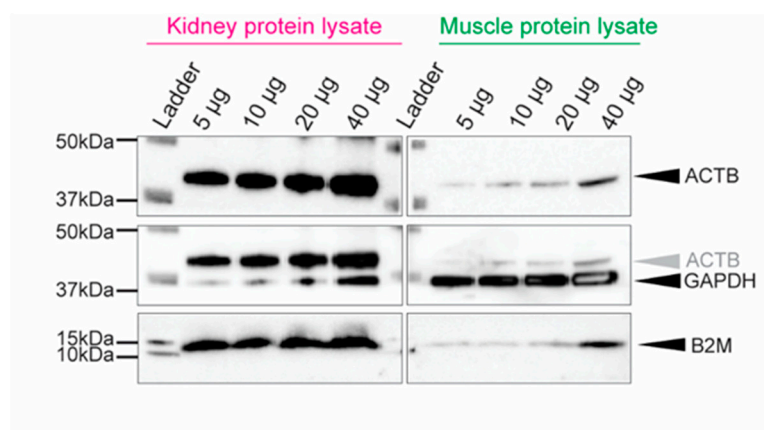

**Figure S2.** Immunoblots against ACTB, GAPDH and B2M using different concentrations of total protein from kidney and skeletal muscle tissue lysates. Note: ACTB membrane was re-probed for GAPDH.

| LUNG                    |                                         | LIVER                 |                                         | KIDNEY                  |                                         | MUSCLE                 |                                         |              |
|-------------------------|-----------------------------------------|-----------------------|-----------------------------------------|-------------------------|-----------------------------------------|------------------------|-----------------------------------------|--------------|
| Genes                   | Geomean of ranking values NAIVE+INJURED | Genes                 | Geomean of ranking values NAIVE+INJURED | Genes                   | Geomean of ranking values NAIVE+INJURED | Genes                  | Geomean of ranking values NAIVE+INJURED |              |
| <i>Rplp2/Tfrc/Rplp0</i> | 1.41                                    | <i>Hprt1/Pgk1/Tbp</i> | 1.41                                    | <i>Pgk1/Rplp0/Rplp2</i> | 1.41                                    | <i>Rplp0/Rplp2/Tbp</i> | 1.41                                    | Most stable  |
| <i>Rplp2/Rplp0</i>      | 1.68                                    | <i>Pgk1/Tbp</i>       | 2.11                                    | <i>Pgk1/Rplp2</i>       | 1.68                                    | <i>Rplp0/Tbp</i>       | 1.86                                    |              |
| <i>Rplp0/Tfrc</i>       | 3                                       | <i>Hprt1/Pgk1</i>     | 2.91                                    | <i>Rplp0/Rplp2</i>      | 3                                       | <i>Rplp0/Rplp2</i>     | 2.71                                    |              |
| <i>Rplp0</i>            | 3.34                                    | <i>Pgk1</i>           | 3.83                                    | <i>Rplp2</i>            | 4.3                                     | <i>Rplp0</i>           | 4.3                                     | Least stable |
| <i>Rplp2/Tfrc</i>       | 4.43                                    | <i>Hprt1/Tbp</i>      | 4.12                                    | <i>Pgk1/Rplp0</i>       | 4.43                                    | <i>Rplp2</i>           | 4.47                                    |              |
| <i>Rplp2</i>            | 6.24                                    | <i>Hprt1</i>          | 4.40                                    | <i>Rplp0</i>            | 5.44                                    | <i>Rplp2/Tbp</i>       | 4.95                                    |              |
| <i>Tfrc</i>             | 6.44                                    | <i>Tbp</i>            | 7                                       | <i>Pgk1</i>             | 5.73                                    | <i>Tbp</i>             | 6.24                                    |              |

**Figure S3.** Gene stability ranking obtained with RefFinder using the three most stable HKG by comparing either single HKG or HKG combinations of two or three genes. The color-scale represents the most (yellow) to least (blue) stable HKG.
